# Supplementary material for: Ordered multimodal porous carbon with hierarchical nanostructure as high performance electrode material for supercapacitors
Source: Royal Society of Chemistry journal article supplement (doi:10.1039/c4ra06724j), 2014-01-01
Supplement: c4ra06724j1.pdf [file c4ra06724j1.pdf]

## **Electronic Supplementary Information**

### **Ordered multimodal porous carbon with hierarchical nanostructure as high performance electrode material for supercapacitor**

Sudeshna Chaudhari, Seon Young Kwon and Jong-Sung Yu\*

Department of Advanced Materials Chemistry, Korea University, 2511 Sejong-ro, Sejong 339-700, Republic of Korea.

E-mail: [jsyu212@korea.ac.kr](mailto:jsyu212@korea.ac.kr); Tel: (+82) 44-860-1494; Fax: (+82) 44-860-1331

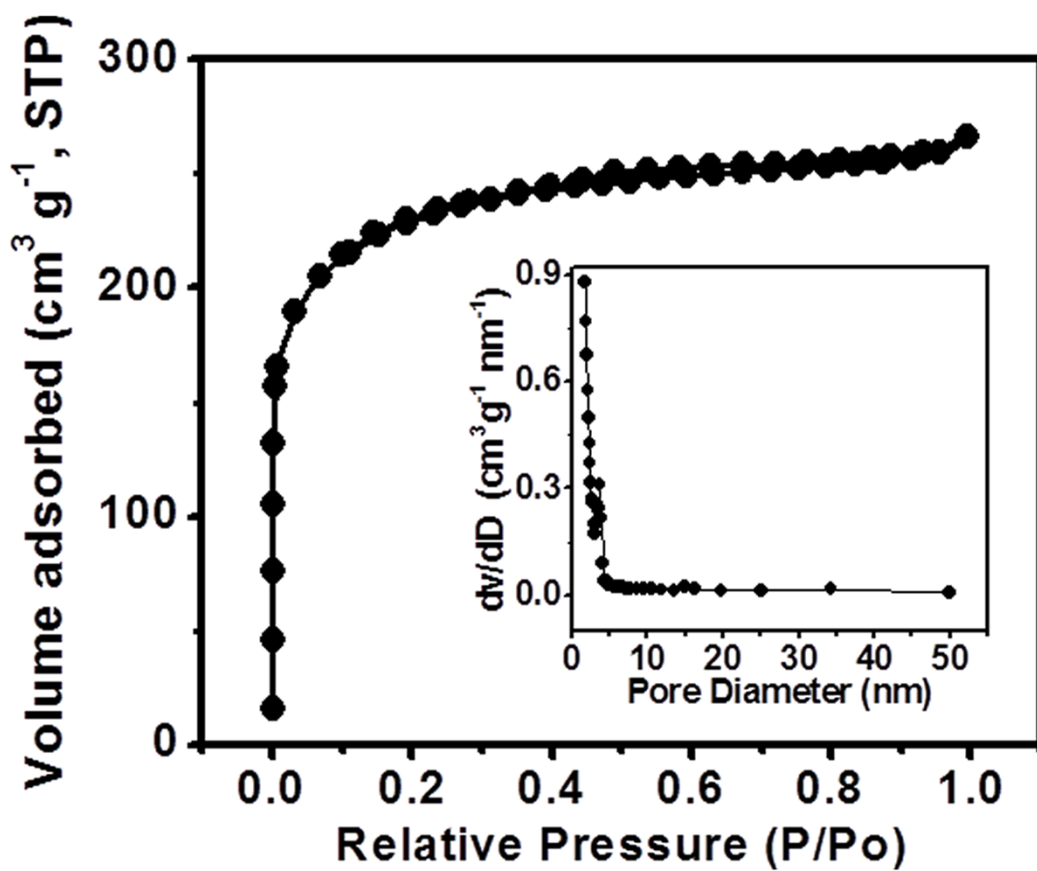

**Fig. S1** (a) N<sub>2</sub> adsorption-desorption isotherm and (b) pore size distribution curve of commercial activated carbon material.

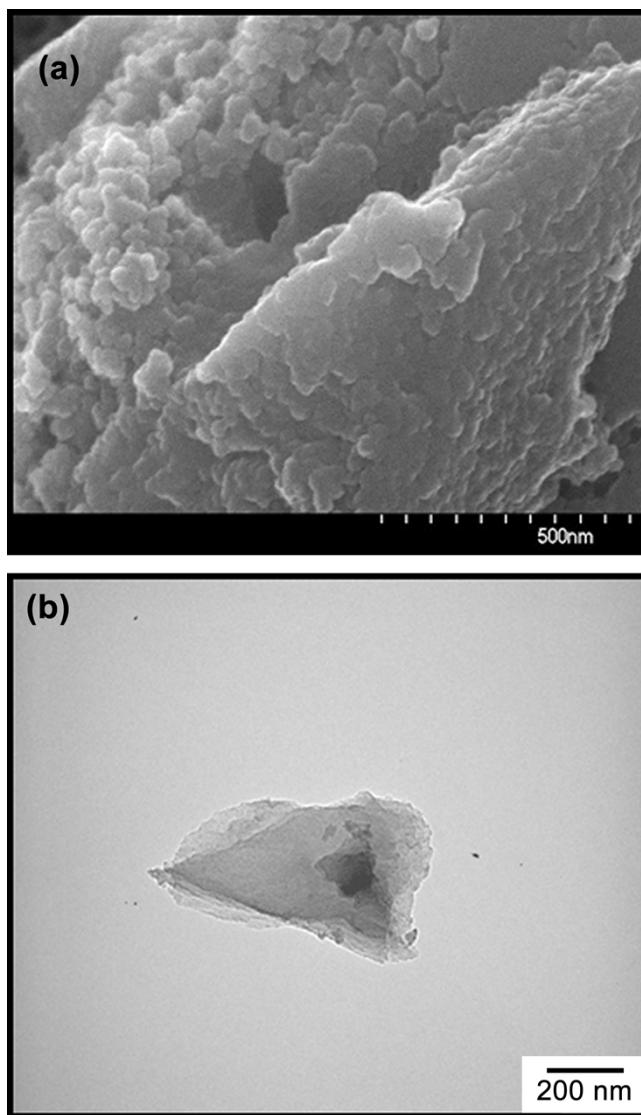

**Fig. S2** SEM (a) and TEM (b) images for commercial activated carbon.
